# THE AMERICAN JOURNAL OF PSYCHIATRY

## En este número

A36

### Perspectivas

#### Editoriales

- 445 **El resultado del trastorno límite de la personalidad: bueno para la mayoría, pero no para todos los pacientes**  
Joel Paris
- 447 **Un enfoque epidemiológico de la “psicosis esteroidea”**  
E. Sherwood Brown
- 450 **Reflexiones sobre los mecanismos neurales subyacentes del delirium**  
Jean-David Gaudreau
- 452 **La neurociencia del desarrollo del abandono emocional, sus consecuencias y las intervenciones psicosociales que pueden revertirlas**  
Daniel S. Schechter
- 455 **Bloqueadores de opiáceos de liberación sostenida para el tratamiento de la dependencia de las anfetaminas y la heroína**  
David M. Penetar

#### Introspección

- 458 **Procedimientos rutinarios**  
Markus Donix

#### Conferencia de Caso Clínico

- 460 **Retos clínicos en la era del Internet**  
Glen O. Gabbard

#### Imágenes en Psiquiatría

- 464 **Caduceo y Esculapio: historia de un error**  
Alexandra C. Sacks y Robert Michels **Audio**

#### Revisión y Resumen

- 465 **Trastorno disfórico premenstrual: evidencia de una nueva categoría para el DSM-5**  
C. Neill Epperson, Meir Steiner, S. Ann Hartlage, Elias Eriksson, Peter J. Schmidt, Ian Jones, y Kimberly A. Yonkers **Audio** **Guías clínicas**

## Nuevas investigaciones

### Artículos

- 476 **Logro y estabilidad de la remisión sintomática sostenida y recuperación entre pacientes con trastorno límite de la personalidad y sujetos de comparación del Eje II: un estudio de seguimiento prospectivo de 16 años**  
Mary C. Zanarini, Frances R. Frankenburg, D. Bradford Reich, y Garrett Fitzmaurice  
**Audio** **Editorial** **Guías clínicas**
- 484 **Predictores prospectivos de la conducta suicida en el trastorno límite de la personalidad en un seguimiento de 6 años**  
Paul H. Soloff and Laurel Chiappetta  
**Audio** **Editorial** **EMC** **Guías clínicas**
- 491 **Conducta suicida y trastornos neuro-psiquiátricos severos después de la terapia glucocorticoide en atención primaria**  
Laurence Fardet, Irene Petersen, y Irwin Nazareth **Audio** **Editorial** **EMC** **Guías clínicas**
- 498 **Conectividad funcional de la red neuronal durante y después de un episodio de delirium**  
Soo-Hee Choi, Hyeongrae Lee, Tae-Sub Chung, Kyung-Min Park, Young-Chul Jung, Sun I. Kim, y Jae-Jin Kim **Audio** **Editorial** **Guías clínicas**
- 508 **Un ensayo controlado aleatorizado comparando cuidado en hogares de adopción (*foster care*) y en instituciones, a niños con signos de trastorno de apego reactivo**  
Anna T. Smyke, Charles H. Zeanah, Mary Margaret Gleason, Stacy S. Drury, Nathan A. Fox, Charles A. Nelson, y Donald Guthrie **Editorial**
- 515 **El genotipo Iso/Val (rs5522) del receptor de mineralocorticoides modera la asociación entre abandono emocional infantil previo y reactividad de la amígdala**  
Ryan Bogdan, Douglas E. Williamson, y Ahmad R. Hariri **Editorial**
- 523 **Menos péptidos beta-amiloide y más F2-Isoprostanos en el LCR en adultos mayores cognitivamente intactos con trastorno depresivo mayor**  
Nunzio Pomara, Davide Bruno, Antero S. Sarreal, Raymundo T. Hernando, Jay Nierenberg, Eva Petkova, John J. Sidtis, Thomas M. Wisniewski, Pankaj D. Mehta, Domenico Pratico, Henrik Zetterberg, y Kaj Blennow **EMC**

**531 Implante de naltrexona para el tratamiento de la politoxicomanía: un ensayo controlado aleatorizado**

Jari Tiihonen, Evgeny Krupitsky, Elena Verbitskaya, Elena Blokhina, Olga Mamontova, Jaana Föhr, Pekka Tuomola, Kimmo Kuoppasalmi, Vesa Kiviniemi, y Edwin Zwartau **Audio** **Editorial** **Guías clínicas**

**Comunicaciones y actualizaciones**

**Cartas al Editor**

- 537** Estándares para la confiabilidad del DSM-5  
Trastorno de ansiedad social y fobia social: efecto del nombre del trastorno en las recomendaciones de tratamiento  
Un caso fatal de íleo adinámico después de iniciar la clozapina  
Paridad de seguro en Salud Mental en Oregon
- 540** **Correcciones**  
Símbolo omitido de los datos.  
Título de libro listado incorrectamente.

**Reseñas Bibliográficas**

- 541** Manual de Dulcan de psiquiatría infantil y juvenil  
Trastornos del espectro obsesivo-compulsivo: refinando la agenda de investigación para el DSM-V  
Profesionalismo en psiquiatría  
Temas religiosos y espirituales en el diagnóstico psiquiátrico: una agenda de investigación para el DSM-V
- 546** **Libros Recibidos**

**Otros temas de interés**

- 547** **Educación Médica Continuada**

**A12** **Directivos de la American Psychiatric Association**

**A15** **Calendario**

**A28** **British Journal of Psychiatry Contenidos**

**Cubierta**

El descontento con un psiquiatra—desde la decepción por una respuesta lenta al tratamiento, la transferencia no resuelta, y temas de la calidad de la atención—ahora se puede expresar y publicar rápidamente por Internet.

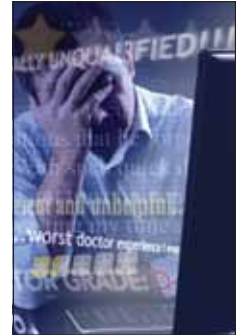

En la conferencia de casos clínicos de este número, Glen O. Gabbard, M.D., presenta un caso de estas características, en el que una madre expresa su ira en Internet, interfiriendo con la confidencialidad y el tratamiento de su hijo y atacando la reputación de un psiquiatra joven. Diseño de la cubierta por Steve Hennessey.

**Audio**

artículo en *AJP Audio*: archivo .mp3 descargable de [ajp.psychiatryonline.org](http://ajp.psychiatryonline.org)

**Guías clínicas**

este artículo ofrece guías clínicas (ver página “En este Número” o al final del artículo)

**EMC**

existe un curso en línea que cubre los contenidos de este artículo para los suscriptores del programa de cursos de EMC del AJP

**Editorial**

este artículo se discute en uno de los editoriales de este número

Presented in collaboration with the Office of Global Health,  
UMDNJ-Robert Wood Johnson Medical School

Translation courtesy of

Sergi Casals, M.S.

*Garuna Editors, Barcelona, Spain*

Carlos Lopez Jaramillo, M.D.

*Universidad de Antioquia, Medellin, Colombia*

and

Javier I. Escobar, M.D., M.Sc.

*UMDNJ-Robert Wood Johnson Medical School*

Consulte *The American Journal of Psychiatry* en línea en  
[ajp.psychiatryonline.org](http://ajp.psychiatryonline.org)
