# THE AMERICAN JOURNAL OF PSYCHIATRY

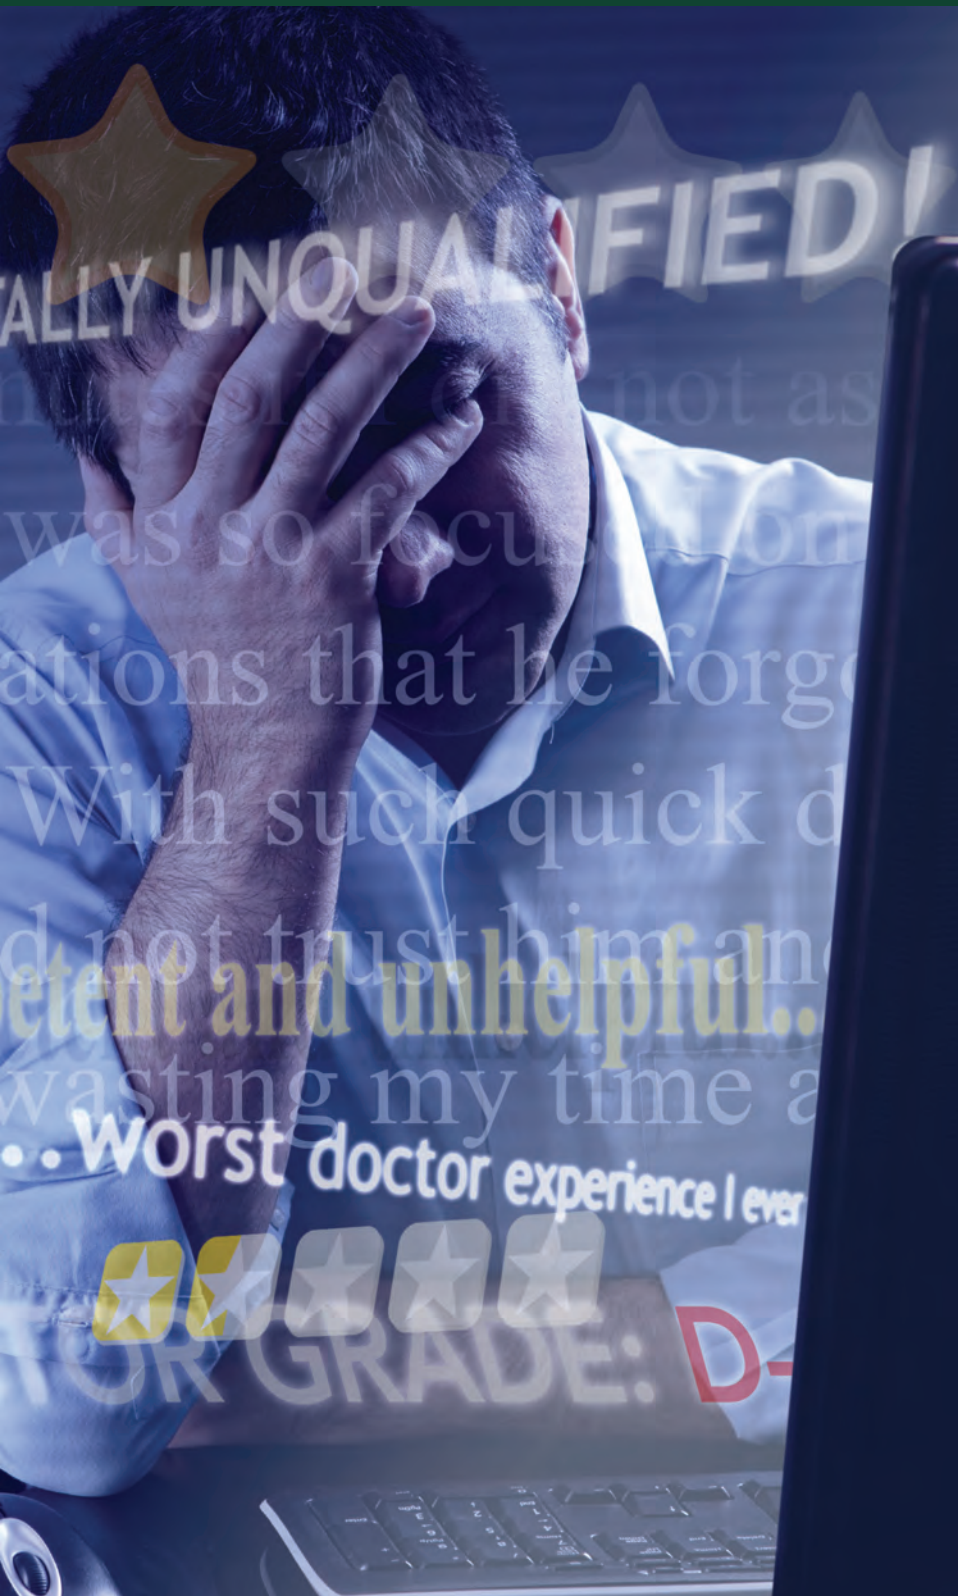

|                                                                                                                                                                                                                                               |     |
|-----------------------------------------------------------------------------------------------------------------------------------------------------------------------------------------------------------------------------------------------|-----|
| ◀ <b>Clinical Challenges in the Internet Era</b><br>Glen O. Gabbard, M.D.                                                                                                                                                                     | 460 |
| <b>Premenstrual Dysphoric Disorder: Evidence for a New Category for DSM-5</b><br>C. Neill Epperson, M.D., et al.                                                                                                                              | 465 |
| <b>Attainment and Stability of Sustained Symptomatic Remission and Recovery Among Patients With Borderline Personality Disorder and Axis II Comparison Subjects: A 16-Year Prospective Follow-Up Study</b><br>Mary C. Zanarini, Ed.D., et al. | 476 |
| <b>Suicidal Behavior and Severe Neuropsychiatric Disorders Following Glucocorticoid Therapy in Primary Care</b><br>Laurence Fardet, M.D., Ph.D., et al.                                                                                       | 491 |
| <b>Continuing Medical Education</b>                                                                                                                                                                                                           | 547 |

May 2012

Volume 169 • Number 5

Official Journal of the  
AMERICAN PSYCHIATRIC ASSOCIATION

[ajp.psychiatryonline.org](http://ajp.psychiatryonline.org)
