# THE AMERICAN JOURNAL OF PSYCHIATRY

## EDITOR-IN-CHIEF

Robert Freedman, M.D.

## DEPUTY EDITORS

David A. Lewis, M.D.

Robert Michels, M.D.

Daniel S. Pine, M.D.

Susan K. Schultz, M.D.

Carol A. Tamminga, M.D.

## EDITORIAL STAFF

**Executive Editor**  
Michael D. Roy

**Senior Editor/Features Writer**  
Jane Weaver, E.L.S.

**Senior Editor**  
John J. Guardiano, Ph.D.

**Production Manager**  
Susan Westrate

**Assistant Editors**  
Katie Duffy  
Angela Moore

**Editorial Support Services  
Manager**  
Nicole Gray

**Editorial Assistant**  
Linda LaCour

**Editorial Assistant/  
Permissions Coordinator**  
Heidi Koch

**Assistants to the Editors**  
Lois Lilienthal  
Laura English  
Rachel Hogg  
Russell A. Scholl

## ASSOCIATE EDITORS

Kathleen T. Brady, M.D., Ph.D.

David A. Brent, M.D.

Linda Brzustowicz, M.D.

Cameron S. Carter, M.D.

Steven Hamilton, M.D., Ph.D.

Daniel C. Javitt, M.D.

Bankole Johnson, M.D.

Ellen Leibenluft, M.D.

Douglas F. Levinson, M.D.

Jeffrey A. Lieberman, M.D.

Barbara Milrod, M.D.

Maria A. Oquendo, M.D.

Jerrold F. Rosenbaum, M.D.

A. John Rush, M.D.

Larry J. Siever, M.D.

Patricia Suppes, M.D., Ph.D.

## EDITOR EMERITA

Nancy C. Andreasen, M.D., Ph.D.

## FORMER EDITORS

Amariah Brigham, M.D.  
1844-1849

T. Romeyn Beck, M.D.  
1849-1854

John P. Gray, M.D.  
1854-1886

G. Alder Blumer, M.D.  
1886-1894

Richard Dewey, M.D.  
1894-1897

Henry M. Hurd, M.D.  
1897-1904

Edward N. Brush, M.D.  
1904-1931

Clarence B. Farrar, M.D.  
1931-1965

Francis J. Braceland, M.D.  
1965-1978

John C. Nemiah, M.D.  
1978-1993

The American Journal of Psychiatry is online at [ajp.psychiatryonline.org](http://ajp.psychiatryonline.org)

# THE AMERICAN PSYCHIATRIC ASSOCIATION

1000 Wilson Blvd., Suite 1825, Arlington, VA 22209-3901  
(888) 357-7924 (toll-free inside the U.S. and Canada) / (703) 907-7300  
web site: [www.psych.org/](http://www.psych.org/) e-mail: [apa@psych.org](mailto:apa@psych.org)

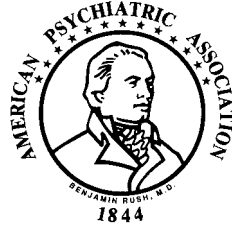

## OFFICERS 2011-2012

|                 |                      |
|-----------------|----------------------|
| President       | John M. Oldham, M.D. |
| President-Elect | Dilip V. Jeste, M.D. |
| Treasurer       | David Fassler, M.D.  |
| Secretary       | Roger Peele, M.D.    |

## ASSEMBLY

|               |                          |
|---------------|--------------------------|
| Speaker       | Ann Marie Sullivan, M.D. |
| Speaker-Elect | R. Scott Benson, M.D.    |
| Recorder      | Melinda Young, M.D.      |

## MEDICAL DIRECTOR'S OFFICE

|                          |                            |
|--------------------------|----------------------------|
| Medical Director and CEO | James H. Scully, Jr., M.D. |
|--------------------------|----------------------------|

## BOARD OF TRUSTEES

|                            |                                  |
|----------------------------|----------------------------------|
| Carol A. Bernstein, M.D.   | Alan F. Schatzberg, M.D.         |
| Brian Crowley, M.D.        | Joyce A. Spurgeon, M.D.          |
| Marc David Graff, M.D.     | Frederick J. Stoddard, Jr., M.D. |
| James A. Greene, M.D.      | Nada L. Stotland, M.D., M.P.H.   |
| Marilyn Griffin, M.D.      | John J. Wernert III, M.D.        |
| Sarah Johnson, M.D., M.Sc. | Alik S. Widge, M.D., Ph.D.       |
| James E. Nininger, M.D.    | William M. Womack, M.D.          |

## PUBLISHER

Rebecca D. Rinehart

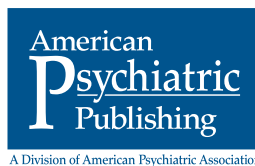

The American Journal of Psychiatry is online at [ajp.psychiatryonline.org](http://ajp.psychiatryonline.org)

THE AMERICAN PSYCHIATRIC ASSOCIATION  
Chairpersons of Councils, Commissions, Committees, and Task Forces

**Standing Committees**

---

**Bylaws**

John O. Gaston, M.D.

**Elections**

Robert E. Kelly, Jr., M.D.

**Ethics**

Richard D. Milone, M.D.

**Finance and Budget**

Frank W. Brown, M.D.

**Audit**

David Fassler, M.D.

**Investment Oversight**

Larry R. Faulkner, M.D.

**Joint Reference**

Dilip V. Jeste, M.D.

**Membership**

Joseph Ezra V. Rubin, M.D.

**Nominating**

Carol A. Bernstein, M.D.

**Tellers**

Eliot Sorel, M.D.

**Council on Addiction Psychiatry**

---

John A. Renner, M.D.

**Council on Advocacy and  
Government Relations**

---

Robert Paul Cabaj, M.D.

*Advocacy and Litigation Funding*

Jeffrey L. Metzner, M.D.

**Council on Children, Adolescents,  
and Their Families**

---

Steven Paul Cuffe, M.D.

*Agnes Purcell McGavin Award*

John E. Schowalter, M.D.

*Blanche F. Ittleson Research Award*

Beth Ann Brooks, M.D.

**Council on Communications**

---

Jeffrey A. Borenstein, M.D.

**Council on Healthcare Systems  
and Financing**

---

Anita Smith Everett, M.D.

*Reimbursement for Psychiatric Care*

Joseph T. English, M.D.

*RBRVS, Codes and Reimbursement*

Ronald M. Burd, M.D.

**Council on Medical Education and  
Lifelong Learning**

---

Sandra Sexson, M.D.

*APA Public Psychiatry Fellowship Selection  
Committee*

Jules M. Ranz, M.D.

*APA/SAMHSA Minority Fellowship Selection and  
Advisory*

Maria A. Oquendo, M.D.

*Scientific Program*

Kenneth R. Silk, M.D.

*Scientific Program Committee of the Institute  
on Psychiatric Services*

David Alan Pollack, M.D.

*Task Force to Update the Ethics Annotations*

Laura W. Roberts, M.D.

*Vestermark Award Committee*

Kailie R. Shaw, M.D.

**Council on Minority Health and  
Health Disparities**

---

Sandra C. Walker, M.D.

**Council on Psychiatry And Law**

---

Patricia R. Recupero, M.D., J.D.

*Isaac Ray Award*

Paul S. Appelbaum, M.D.

*Judicial Action*

Paul S. Appelbaum, M.D.

*Manfred S. Guttmacher Award*

Marilyn Price, M.D., C.M.

**Council on Psychosomatic  
Medicine and Geriatric Psychiatry**

---

Robert Paul Roca, M.D.

**Council on Research and Quality  
Care**

---

Jeffrey A. Lieberman, M.D.

*Electronic Health Records*

Steven Roy Daviss, M.D.

*Psychiatric Dimensions of Disasters*

Robert J. Ursano, M.D.

*Research Awards*

Stuart C. Yudofsky, M.D.

*Steering Committee on Practice Guidelines*

Joel Yager, M.D.

*Task Force on DSM-V*

David J. Kupfer, M.D.

*Task Force on Gender Identity Disorder*

William M. Byne, M.D.

# The American Journal of PSYCHIATRY

Latest  
IMPACT  
FACTOR  
12.759!

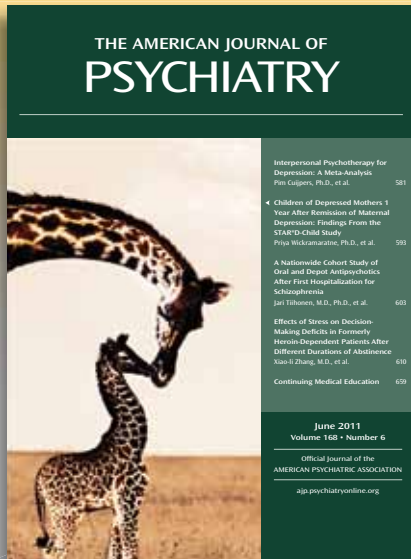

## Official Journal of the American Psychiatric Association

Edited by Robert Freedman, M.D.

- The *American Journal of Psychiatry* has an impact factor of 12.759, a rise from last year's 12.522 and 2-point rise from the previous year's 10.545, according to the recently released 2010 Journal Citation Reports® (Thomson Reuters, 2011), placing it 2nd among the 126 journals in psychiatry journals indexed, while still remaining the far-and-away leader in total citations.

- *The American Journal of Psychiatry* (AJP) is also the #2 journal in psychiatry in terms of immediacy according to Thomson Scientific's Immediacy Index. This important performance metric

is calculated by dividing the number of citations to articles published in a given year by the number of articles published in that year.

- The Immediacy Index is a good measure of how quickly a given journal's articles are cited—AJP's #2 placement is a result of publishing articles that are relevant, covering current “hot” topics and cutting-edge research, and getting these findings to the field faster with AJP in Advance, the Journal's online-ahead-of-print publication protocol.

- A recent poll conducted by the BioMedical & Life Sciences Division of The Special Libraries Association identified the 100 most influential journals in all of Biology & Medicine over the last 100 years. *The American Journal of Psychiatry* was among those honored, the only psychiatry/psychology journal represented.

No other psychiatric journal reaches more psychiatrists with greater impact or immediacy than the journal that the overwhelming majority of psychiatrists considers essential: AJP.

ISSN 0002-953X      [ajp.psychiatryonline.org](http://ajp.psychiatryonline.org)

To order a subscription, visit [www.appi.org](http://www.appi.org).

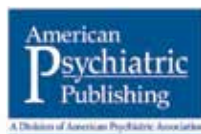

The First and Last Word in Psychiatry

[www.appi.org](http://www.appi.org) • 1-800-368-5777 • 703-907-7322

Find us on [facebook](https://www.facebook.com/ajp) and [twitter](https://twitter.com/ajp)      Priority Code AH1132

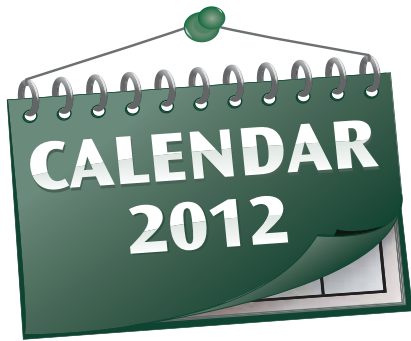

*For free listing of your organization's official annual or regional meeting, please send us the following information: sponsor, location, inclusive dates, type and number of continuing education credits (if available), and the name, address, and telephone number of the person or group to contact for more information. In order for an event to appear in our listing, all notices and changes must be received at least 6 months in advance of the meeting and should be addressed to:*

*Calendar, American Journal of Psychiatry, 1000 Wilson Boulevard, Suite 1825, Arlington, VA 22209-3901, [swestrate@psych.org](mailto:swestrate@psych.org) (e-mail).*

*Because of space limitations, only listings of meetings of the greatest interest to Journal readers may be included.*

## MAY

**May 3–5**, 56th Annual Meeting, American Academy of Psychoanalysis and Dynamic Psychiatry, Philadelphia, Pa. Contact: Executive Office, AAPDP, PO Box 30, Bloomfield, CT 06002; (888) 691-8281 (tel), (860) 286-0787 (fax), [info@aapdp.org](mailto:info@aapdp.org) (e-mail), [www.aapdp.org](http://www.aapdp.org) (web site).

**May 5–9**, 165th Annual Meeting, American Psychiatric Association, Philadelphia, Pa. Contact: APA Annual Meetings Dept., 1000 Wilson Blvd., Ste. 1825, Arlington, VA 22209; (703) 907-7815.

## JUNE

**June 14–16**, 38th Annual Meeting, Association of Directors of Medical Student Education in Psychiatry, Blaine, Wash. Contact: Gary L. Beck, Ph.D., (402) 559-7351; [gbeck@unmc.edu](mailto:gbeck@unmc.edu) (email).

**June 23–27**, Joint Organizational Meeting of the Organization of Teratology Information Specialists, the Teratology Society, and the Neurobehavioral Teratology Society, Baltimore, Md. Contact Ms. Dee Quinn, University of Arizona, Drachman Hall, PO Box 210202, 1295 N. Martin, Room B308, Tucson, AZ 85721-0202; (520) 626-3547 (tel); [www.otispregnancy.org](http://www.otispregnancy.org); [www.teratology.org](http://www.teratology.org); [www.nbts.org](http://www.nbts.org).

## SEPTEMBER

**September 21–23**, 5th International Conference on Schizophrenia (ICONS V), Chennai, India. Organised by the Schizophrenia Research Foundation (India) in collaboration with Schizophrenia International Research Society. Co-sponsored by WPA, Indian Psychiatric Society. For details see [www.icons-scarf.org](http://www.icons-scarf.org).

**September 27–29**, 2nd International Congress on Borderline Personality Disorder and Allied Disorders, Amsterdam RAI Convention Center, The Netherlands. Contact Theo Ingenhoven, Scientificcommittee@esspd.eu (email); or [borderline2012@cpo-hanser.de](mailto:borderline2012@cpo-hanser.de) (email); <http://www.borderline-congress.org> (web site).

## OCTOBER

**October 3–5**, International Biennial Congress of the Marcé Society (International Society for the Understanding, Prevention and Treatment of Mental Illness Related to Childbearing), in collaboration with the Société Marcé Francophone, Paris, France (conducted in English). Contact: Ms. Nicole Greer, 5034-A Thoroughbred Lane, Brentwood, TN 37027 USA; (615) 324-2362 (tel); [info@marcesociety.com](mailto:info@marcesociety.com) (email); [www.marcesociety.com](http://www.marcesociety.com) (web site).

**October 3–7**, Joint Meeting of the Southern Psychiatric Association; Maryland Psychiatric Society; and West Virginia Psychiatric Society, White Sulphur Springs, West Virginia (The Greenbrier). Contact Susan Proctor, (410) 938-3403; [www.sopsych.org](http://www.sopsych.org) (web site).

**October 4–7**, 64th Institute on Psychiatric Services, American Psychiatric Association, New York, NY. Contact: Jill Gruber, APA Annual Meetings Dept., 1000 Wilson Blvd., Ste. 1825, Arlington, VA 22209; (703) 907-7815.

## JUNE 2013

**June 6–9**, 4th World Congress on ADHD: From Childhood to Adult Disease, Milan, Italy. Contact Congress Organizer, +49-40-670 88 20 (tel); [adhd2013@cpo-hanser.de](mailto:adhd2013@cpo-hanser.de) (email); [www.adhd-congress.org](http://www.adhd-congress.org) (web site).

## JULY 2014

**July 8–13**, 28th International Congress of Applied Psychology, Palais des Congrès de Paris, France. Contact [exh@icap2014.com](mailto:exh@icap2014.com) (email); [www.icap2014.com](http://www.icap2014.com) (web site).

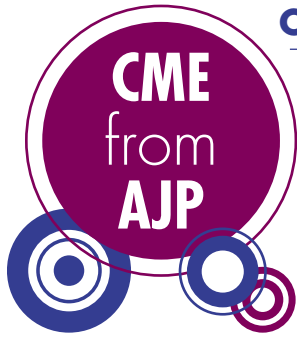

## Continuing Medical Education

Three articles in this issue form the basis of a short course with questions that can be answered for up to 1 *AMA PRA Category 1 Credit™* each by visiting <http://psychiatryonline.org/cme.aspx> and clicking on the “American Journal of Psychiatry” tab.

CME credit is issued only online, and a paid subscription to the AJP CME course program is required.

This month's courses appear on pages 547–550.

FREE AUDIO!

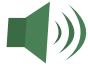

## Have You Heard?

You can listen to highlights of *The American Journal of Psychiatry* by downloading a monthly free .mp3 audio file from our web site (<http://ajp.psychiatryonline.org/audio.aspx#>) or by subscribing to the AJP Audio podcast at iTunes or other feed reader. Presented by Deputy Editor Dr. Susan Schultz or by Executive Editor Michael Roy, each month's audio lasts approximately 30 minutes and covers several research articles, the Treatment in Psychiatry feature, and one or two editorials.

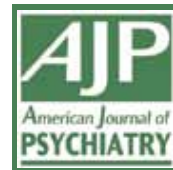

Coming in the June 2012 issue\*

## THE AMERICAN JOURNAL OF PSYCHIATRY

Intermittent Explosive Disorder as a Disorder of Impulsive Aggression for DSM-5  
E.F. Coccaro

Differences in White Matter Fiber Tract Development Present From 6 to 24 Months  
in Infants With Autism

J.J. Wolff, H. Gu, G. Gerig, J.T. Ellison, M. Styner, S. Gouttard, K.N. Botteron, S.R. Dager, G. Dawson, A.M. Estes, A.C. Evans, H.C. Hazlett, P. Kostopoulos, R.C. McKinstry, S.J. Paterson, R.T. Schultz, L. Zwaigenbaum, and J. Piven

Prevention of Postpartum Psychosis and Mania in Women at High Risk  
V. Bergink, P.F. Bouvy, J.S.P. Vervoort, K.M. Koorengel, E.A.P. Steegers, and S.A. Kushner

Maternal Antibodies to Dietary Antigens and Risk for Nonaffective Psychosis in Offspring  
H. Karlsson, A. Blomström, S. Wicks, S. Yang, R.H. Yolken, and C. Dalman

\*Can't wait? Visit [ajp.psychiatryonline.org/AJPInAdvance.aspx](http://ajp.psychiatryonline.org/AJPInAdvance.aspx) to see all articles uploaded in advance of print!



# The Residents' JOURNAL

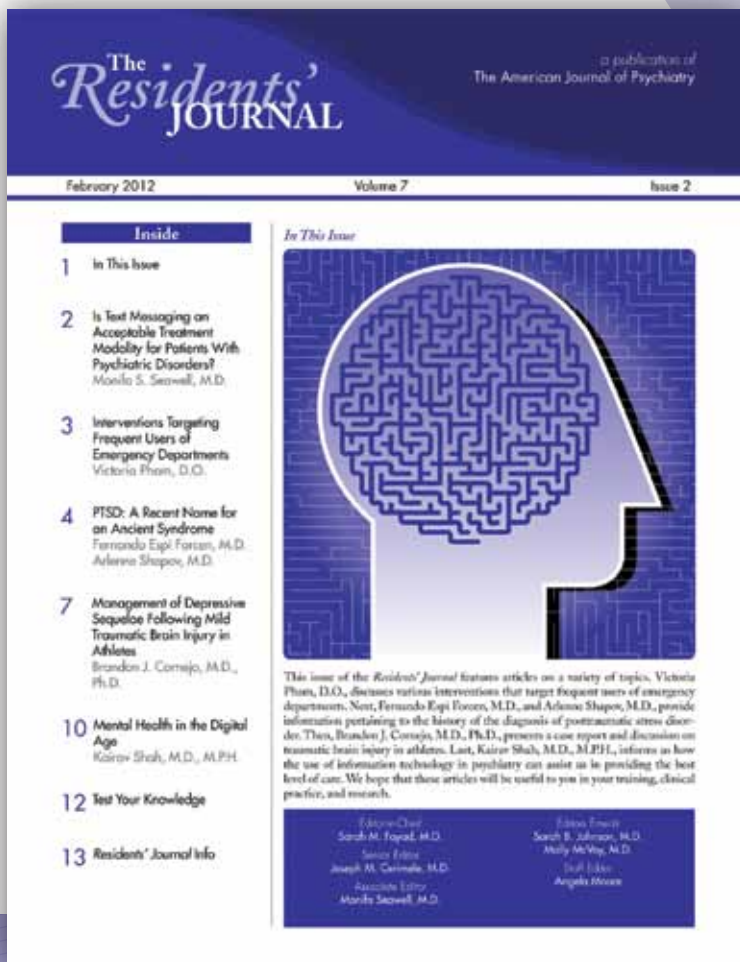

The Residents' Journal accepts manuscripts authored by medical students, resident physicians, and fellows. To submit your paper, please visit the manuscript submission site at [mc.manuscriptcentral.com/appi-ajp](http://mc.manuscriptcentral.com/appi-ajp) and either create an account or use your existing account. For manuscript type, select "Residents." Then follow the instructions to upload your manuscript. Residents who are interested in participating as Guest Section Editors should e-mail the Residents' Journal Editor-in-Chief Sarah M. Fayad at [fayad@ufl.edu](mailto:fayad@ufl.edu).

See the September 2010 issue for details on the new peer review process.

The Residents' Journal is sent free-of-charge to all psychiatry residents. Anyone interested in being included on the distribution list should contact Angela Moore, the Residents' Journal staff editor at [ajp@psych.org](mailto:ajp@psych.org) with "Subscribe to Residents' Journal" in the subject line.

## Contents

- A17 Editorial Board  
A19 Highlights of this issue

## Editorials

- 353 Autoimmunity in psychiatry  
K. Davison

- 355 The therapeutic alliance – in 100 words  
Simon Heyland

- 356 Self-harm in older people: a clear need for specialist assessment and care  
M. S. Dennis and D. W. Owens

- 358 Rembrandt Bugatti – fallen stars  
Raymond Cavanaugh Jr

- 359 Mindfulness-based cognitive therapy: a promising new approach to preventing depressive relapse  
J. M. G. Williams and W. Kuyken

- 361 Behavioural activation: history, evidence and promise  
J. W. Kanter, A. J. Puspitasari, M. M. Santos and G. A. Nagy

- 363 Why Did You Become a Doctor? – poems by doctors  
Miles Burrows

## Review article

- 364 Severe mental illness in 33 588 prisoners worldwide: systematic review and meta-regression analysis  
S. Fazel and K. Seewald

## Papers

- 374 Prevalence of autoimmune diseases in in-patients with schizophrenia: nationwide population-based study  
S.-J. Chen, Y.-L. Chao, C.-Y. Chen, C.-M. Chang, E. C.-H. Wu, C.-S. Wu, H.-H. Yeh, C.-H. Chen and H.-J. Tsai

- 380 Mrs Nicely Nice – poem  
Kate Evans

- 381 Prevalence of anti-basal ganglia antibodies in adult obsessive-compulsive disorder: cross-sectional study  
T. R. J. Nicholson, S. Ferdinando, R. B. Krishniah, S. Anhoury, B. R. Lennox, D. Mataix-Cols, A. Cleare, D. M. Veale, L. M. Drummond, N. A. Fineberg, A. J. Church, G. Giovannoni and I. Heyman

- 387 Extrapyramidal motor side-effects of first- and second-generation antipsychotic drugs  
M. J. Peluso, S. W. Lewis, T. R. E. Barnes and P. B. Jones

- 393 Trends in prescriptions and costs of drugs for mental disorders in England, 1998–2010  
S. Ilyas and J. Moncrieff

- 399 Risk factors for repetition and suicide following self-harm in older adults: multicentre cohort study  
E. Murphy, N. Kapur, R. Webb, N. Purandare, K. Hawton, H. Berger, K. Waters and J. Cooper

- 405 Suicide and non-suicide mortality after self-harm in Taipei City, Taiwan  
C.-J. Kuo, D. Gunnell, C.-C. Chen, P. S. F. Yip and Y.-Y. Chen

- 412 Email-based promotion of self-help for subthreshold depression: Mood Memos randomised controlled trial  
A. J. Morgan, A. F. Jorm and A. J. Mackinnon

- 419 Public recognition of mental disorders and beliefs about treatment: changes in Australia over 16 years  
N. J. Reavley and A. F. Jorm

## Short report

- 426 Strengths and Difficulties Questionnaire scores and mental health in looked after children  
A. Goodman and R. Goodman

## Columns

- 428 Correspondence  
431 Reading about . . . The history of psychiatry  
434 Book reviews  
436 Contents of *Advances in Psychiatric Treatment*  
437 Contents of the *American Journal of Psychiatry*  
438 From the Editor's desk

## Cover picture

*Health Screen* (2012)  
David Shillinglaw (b. 1982)

*Health Screen* is a hand-painted illustration for MedFest 2012 by London-based artist David Shillinglaw. Influenced by contemporary anatomical drawings and ancient Egyptian hieroglyphs, the work is a playful attempt to capture the broad spectrum of issues running throughout the medical film festival.

Shillinglaw graduated from Central Saint Martins in 2002 and has exhibited in galleries in Japan, China, The Netherlands, and cities such as New York, London, Berlin and Istanbul. His work moves between street and studio, from small hand-made books to paintings on canvas and large-scale wall murals. He observes: 'Life is a struggle. For everyone: from the smallest insect to the greatest beast, we are determined by the success we seek, and how, in turn we measure that success. Each of us experiencing ups and downs. Peaks and troughs. Like a game of snakes and ladders.'

MedFest is the first ever national medical film festival, and this year's theme was: 'HealthScreen: Understanding illness through Film. The remit of MedFest 2012 was to provoke debate about the social, political and ethical implications of depictions of health and illness on our screens.

For more information on the artist please visit [www.davidshillinglaw.co.uk](http://www.davidshillinglaw.co.uk), or MedFest at [www.medfest.co.uk](http://www.medfest.co.uk).

We are always looking for interesting and visually appealing images for the cover of the *Journal* and would welcome suggestions or pictures, which should be sent to Dr Allan Beveridge, British Journal of Psychiatry, 17 Belgrave Square, London SW1X 8PG, UK or [bjp@rpsych.ac.uk](mailto:bjp@rpsych.ac.uk).

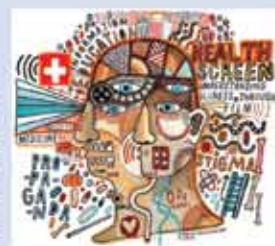

Source: https://psychiatryonline.org/doi/suppl/10.1176/ajp.2012.169.issue-5/suppl_file/front.pdf
